# Supplementary material for: Bio-Fermented Malic Acid Facilitates the Production of High-Quality Chicken via Enhancing Muscle Antioxidant Capacity of Broilers
Source: MDPI journal article supplement (doi:10.3390/antiox11122309), 2022-11-22
Supplement: s1 [file s1]

Supplemental Table S1. The list of commercial kits purchased from Nanjing  
Jiancheng Bioengineering Institute

| Index       | Name of kits                              | Cat No.  |
|-------------|-------------------------------------------|----------|
| GSH-Px      | Glutathione Peroxidase (GSH-PX) assay kit | A005-1-2 |
| GSH         | Reduced glutathione (GSH) assay kit       | A006-2-1 |
| SOD         | Superoxide Dismutase (SOD) assay kit      | A001-3-2 |
| MDA         | Malondialdehyde (MDA) assay kit           | A003-1-2 |
| T-AOC       | Total antioxidant capacity assay kit      | A015-1-2 |
| IgA         | Immunoglobulin A assay kit                | H108-1-2 |
| IgM         | Immunoglobulin M assay kit                | H109-1-1 |
| IgG         | Immunoglobulin G assay kit                | H106-1-1 |
| Lactic acid | Lactic Acid assay kit                     | A019-2-1 |
